# Supplementary material
Source: ML conference proceedings conference paper supplement (https://proceedings.neurips.cc/paper_files/paper/2022/hash/40bfe6177e8aed33c982264cf9e6e62c-Abstract.html)
Supplement: Supplementary file 1 [file 40bfe6177e8aed33c982264cf9e6e62c-Supplemental-Conference.zip]

Archive with 2 entries (2 files):
- Supplemental_Material.pdf
- Demo.mp4
